# Supplementary material for: Mapping gaseous dimethylamine, trimethylamine, ammonia, and their particulate counterparts in marine atmospheres of China's marginal seas – Part 1: Differentiating marine emission from continental transport
Source: Copernicus journal article supplement (doi:10.5194/acp-21-16413-2021), 2021-11-09
Supplement: Supplementary file 1 [file acp-21-16413-2021-supplement.pdf]

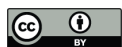

*Supplement of*

**Mapping gaseous dimethylamine, trimethylamine, ammonia, and their particulate counterparts in marine atmospheres of China's marginal seas – Part 1: Differentiating marine emission from continental transport**

**Dihui Chen et al.**

*Correspondence to:* Xiaohong Yao (xhyao@ouc.edu.cn)

The copyright of individual parts of the supplement might differ from the article licence.

# Supplement

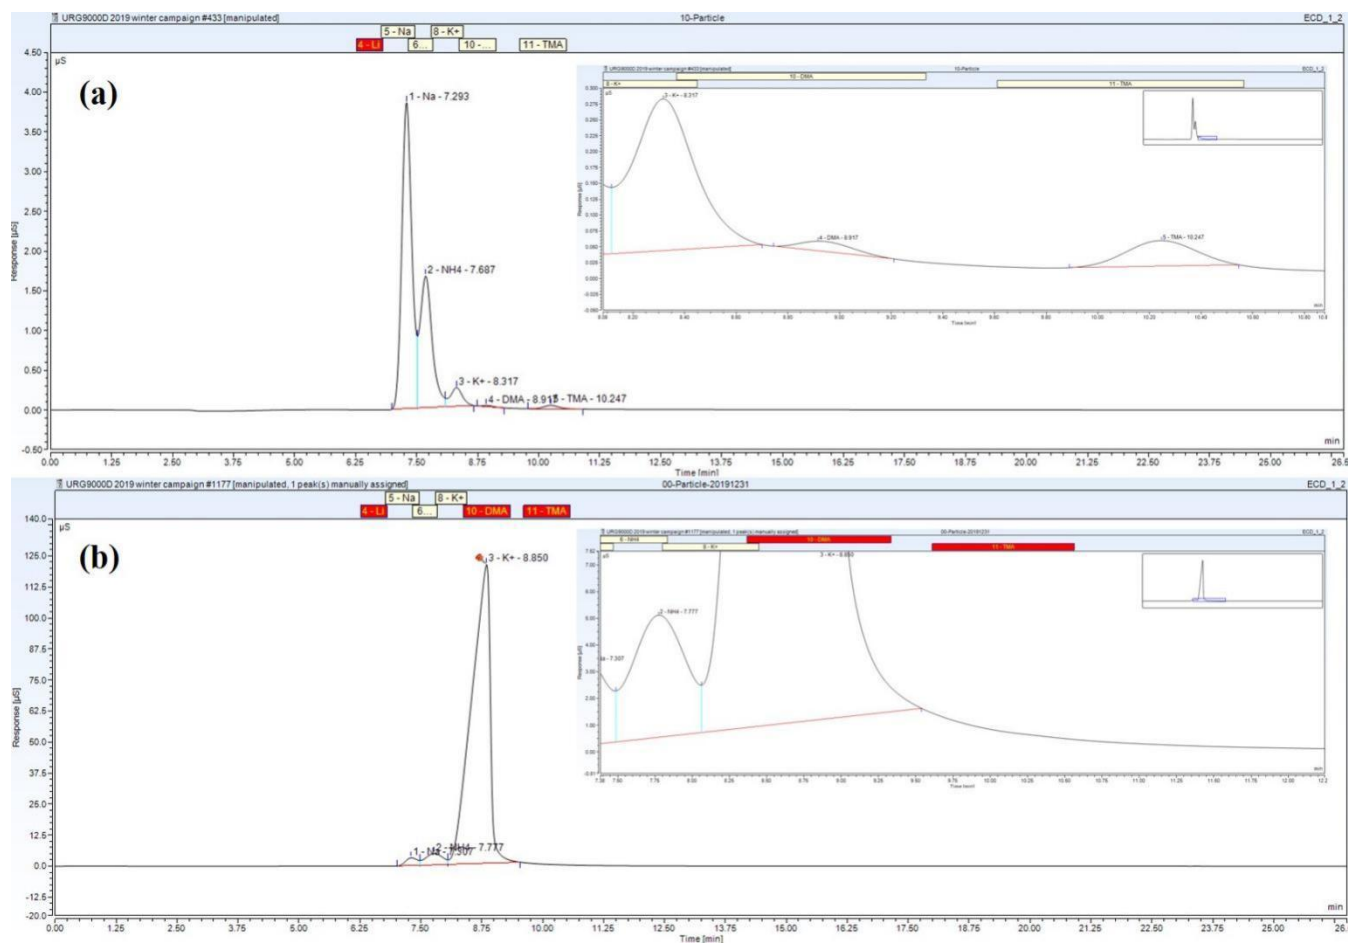

Figure S1. Two chromatograph figures for cations without and with K<sup>+</sup> interference ((a): without K<sup>+</sup> interference; (b): with K<sup>+</sup> interference)

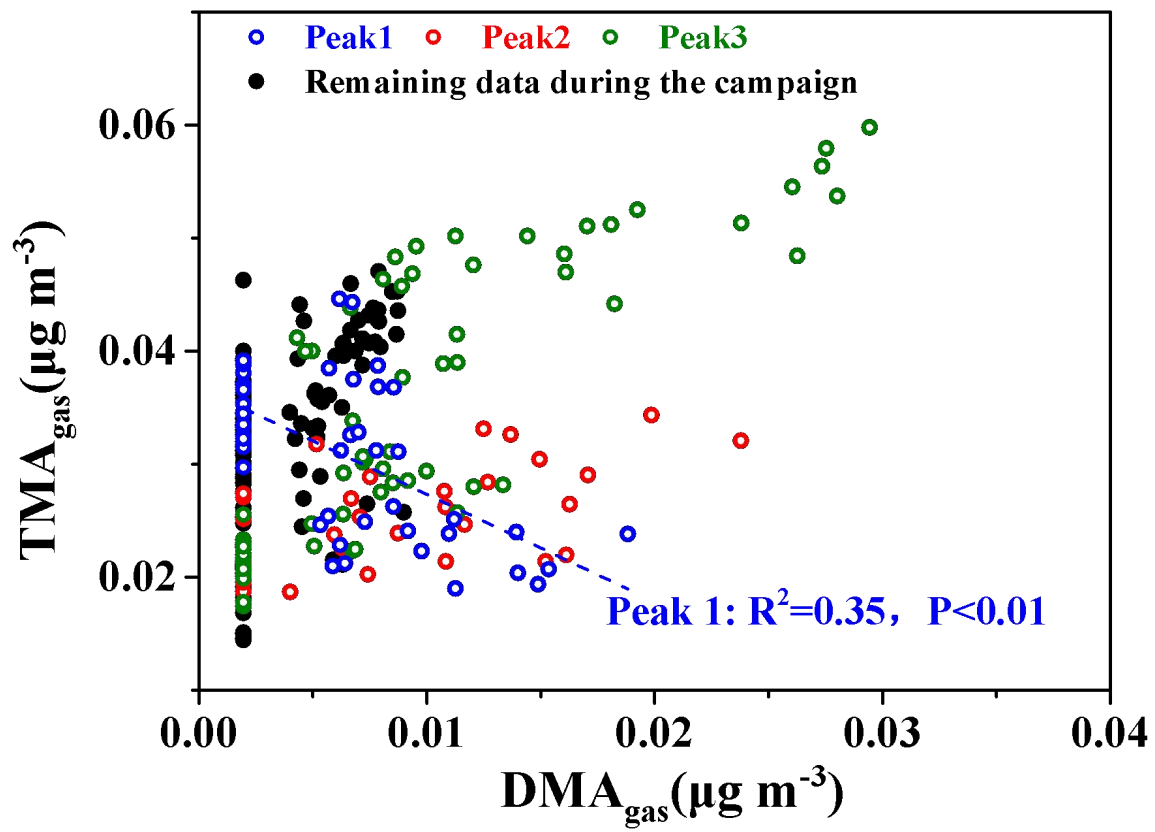

Figure S2. Relationship between DMA<sub>gas</sub> and TMA<sub>gas</sub> during the whole campaign.

**Table S1. Atmospheric Gaseous and Aerosol Concentrations of DMA and TMA in the marine atmosphere during the campaigns and at the coastal sites with published data.**

| Location                           | sampling period                    | source             | concentrations of species ( $\mu\text{g m}^{-3}$ ) |                       |                   |                       |
|------------------------------------|------------------------------------|--------------------|----------------------------------------------------|-----------------------|-------------------|-----------------------|
|                                    |                                    |                    | DMA <sub>gas</sub>                                 | TMA <sub>gas</sub>    | DMAH <sup>+</sup> | TMAH <sup>+</sup>     |
| Yellow and Bohai Seas (Campaign A) | December 9 - 22, 2019              | this study         | 0.006±0.006                                        | 0.031±0.009           | 0.065±0.068       | 0.28±0.17             |
| Arabian Sea                        | November 16 to December 19 in 1994 | Gibb et al. (1999) | 0.0088                                             | 4.8 *10 <sup>-4</sup> | 0.011             | 4.8 *10 <sup>-4</sup> |
| Yellow sea and Northwest Pacific   | April, 2015                        |                    | /                                                  | /                     | 0.013±0.011       | 0.013±0.014           |
| East China Sea                     | June, 2016                         |                    | /                                                  | /                     | 0.031±0.010       | 0.012±0.007           |
| Yellow sea and Bohai sea           | August, 2015                       | Xie et al. (2018)  | /                                                  | /                     | 0.024±0.013       | 0.019±0.007           |
|                                    | June-July, 2016                    |                    | /                                                  | /                     | 0.051±0.022       | 0.021±0.008           |
| South Yellow Sea (SYS)             | November, 2013                     |                    | /                                                  | /                     | 0.019±0.017       | 0.032±0.020           |
| Coastal site1                      | November-December, 2013            |                    | /                                                  | /                     | 0.016±0.018       | 0.002±0.001           |
| Coastal site2                      | August, 2016                       |                    | /                                                  | /                     | 0.029±0.023       | 0.009±0.007           |
| SYS                                | November, 2012                     |                    | /                                                  | /                     | 0.013±0.005       | 0.030±0.013           |
| North Yellow Sea and Bohai Sea     | November, 2012                     | Yu et al. (2016)   | /                                                  | /                     | -                 | 0.015±0.007           |

Table S2. Summary of min-max values and mean values of amine in gas and particle phase during the campaigns.

| Location                           | sampling period                                                                      | concentrations of species ( $\mu\text{g m}^{-3}$ ) |                              |                             |                             |
|------------------------------------|--------------------------------------------------------------------------------------|----------------------------------------------------|------------------------------|-----------------------------|-----------------------------|
|                                    |                                                                                      | min-max valu (mean value)                          |                              |                             |                             |
|                                    |                                                                                      | DMA <sub>gas</sub>                                 | TMA <sub>gas</sub>           | DMAH <sup>+</sup>           | TMAH <sup>+</sup>           |
| Yellow and Bohai Seas (Campaign A) | December 9 - 22, 2019                                                                | <LOD-0.029<br>(0.006±0.006)                        | 0.014-0.060<br>(0.031±0.009) | 0.006-0.41<br>(0.065±0.068) | 0.057-1.8<br>(0.28±0.17)    |
| coastal site (36.34°N, 120.67°E)   | August 1-9 ,<br>September 12<br>- October 1,<br>November 16<br>- December 1,<br>2019 | <LOD-0.14<br>(0.018±0.021)                         | <LOD-0.004<br>(0.001±0.001)  | <LOD-0.097<br>(0.017±0.013) | <LOD-0.004<br>(0.001±0.001) |
